# Supplementary material for: Enhanced catalyst selectivity in the direct synthesis of H2O2 through Pt incorporation into TiO2 supported AuPd catalysts
Source: Royal Society of Chemistry journal article supplement (doi:10.1039/d0cy01079k), 2020-01-01
Supplement: d0cy01079k1.pdf [file d0cy01079k1.pdf]

## Enhanced catalyst selectivity in the direct synthesis of H<sub>2</sub>O<sub>2</sub> through Pt incorporation into TiO<sub>2</sub> supported AuPd catalysts.

Xiaoxiao Gong<sup>[a][b]</sup> †, Richard J. Lewis<sup>[a]</sup> †, Song Zhou<sup>[c][d][e]</sup>, David J. Morgan<sup>[a]</sup>, Thomas E. Davies<sup>[a]</sup>, Xi Liu<sup>[c][f]</sup>, Christopher J. Kiely<sup>[a,g]</sup>, Baoning Zong<sup>[b]</sup> \* and Graham J. Hutchings<sup>[a]</sup> \*

<sup>a</sup>Cardiff Catalysis Institute, School of Chemistry, Cardiff University, Main Building, Park Place, Cardiff, CF10 3AT, United Kingdom.

<sup>b</sup>Laboratory of Catalytic Materials and Chemical Engineering, Research Institute of Petroleum Processing, SINOPEC, Beijing, 100083, P.R.China

<sup>c</sup>SynCat@Beijing, Synfuels China Technology Co. Ltd. Beijing, 101407, P.R.China

<sup>d</sup>State Key Laboratory of Coal Convers, Institute of Coal Chemistry, Chinese Academy of Sciences, Taiyuan, 030001, P.R.China

<sup>e</sup>School of Chemistry and Chemical Engineering, University of Chinese Academy of Sciences, Beijing, 100049, P.R.China

<sup>f</sup>School of Chemistry and Chemical, In-situ Centre for Physical Science, Shanghai Jiao Tong University, 200240, Shanghai, P. R. China

<sup>g</sup> Department of Materials Science and Engineering, Lehigh University, Bethlehem, PA 18015, USA

† These authors contributed equally to this work

\*Zongbn.ripp@sinopec.com, Hutch@cardiff.ac.uk

**Supplementary Information.**

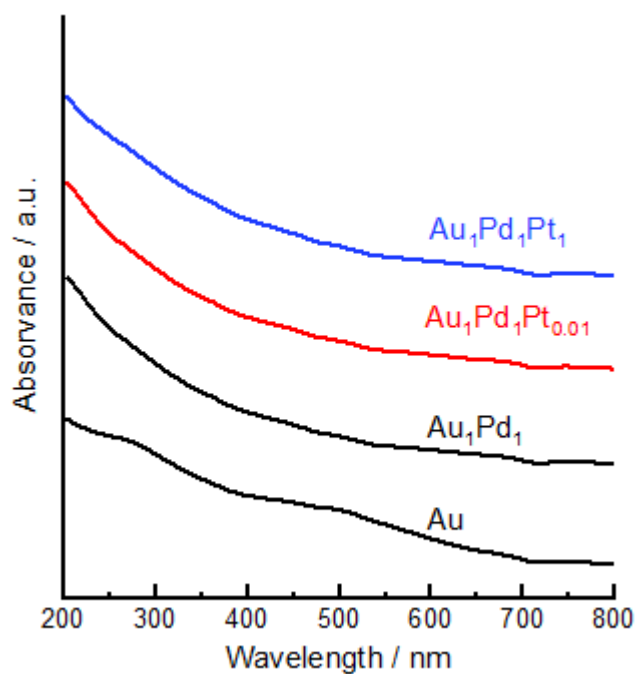

**Figure S1.** Representative UV-vis spectra from aqueous sol-immobilisation prepared colloidal catalysts prior to immobilisation. The absence of the Au plasmon peak (at approx. 550 nm) in the bimetallic and trimetallic colloids indicative of alloy formation.

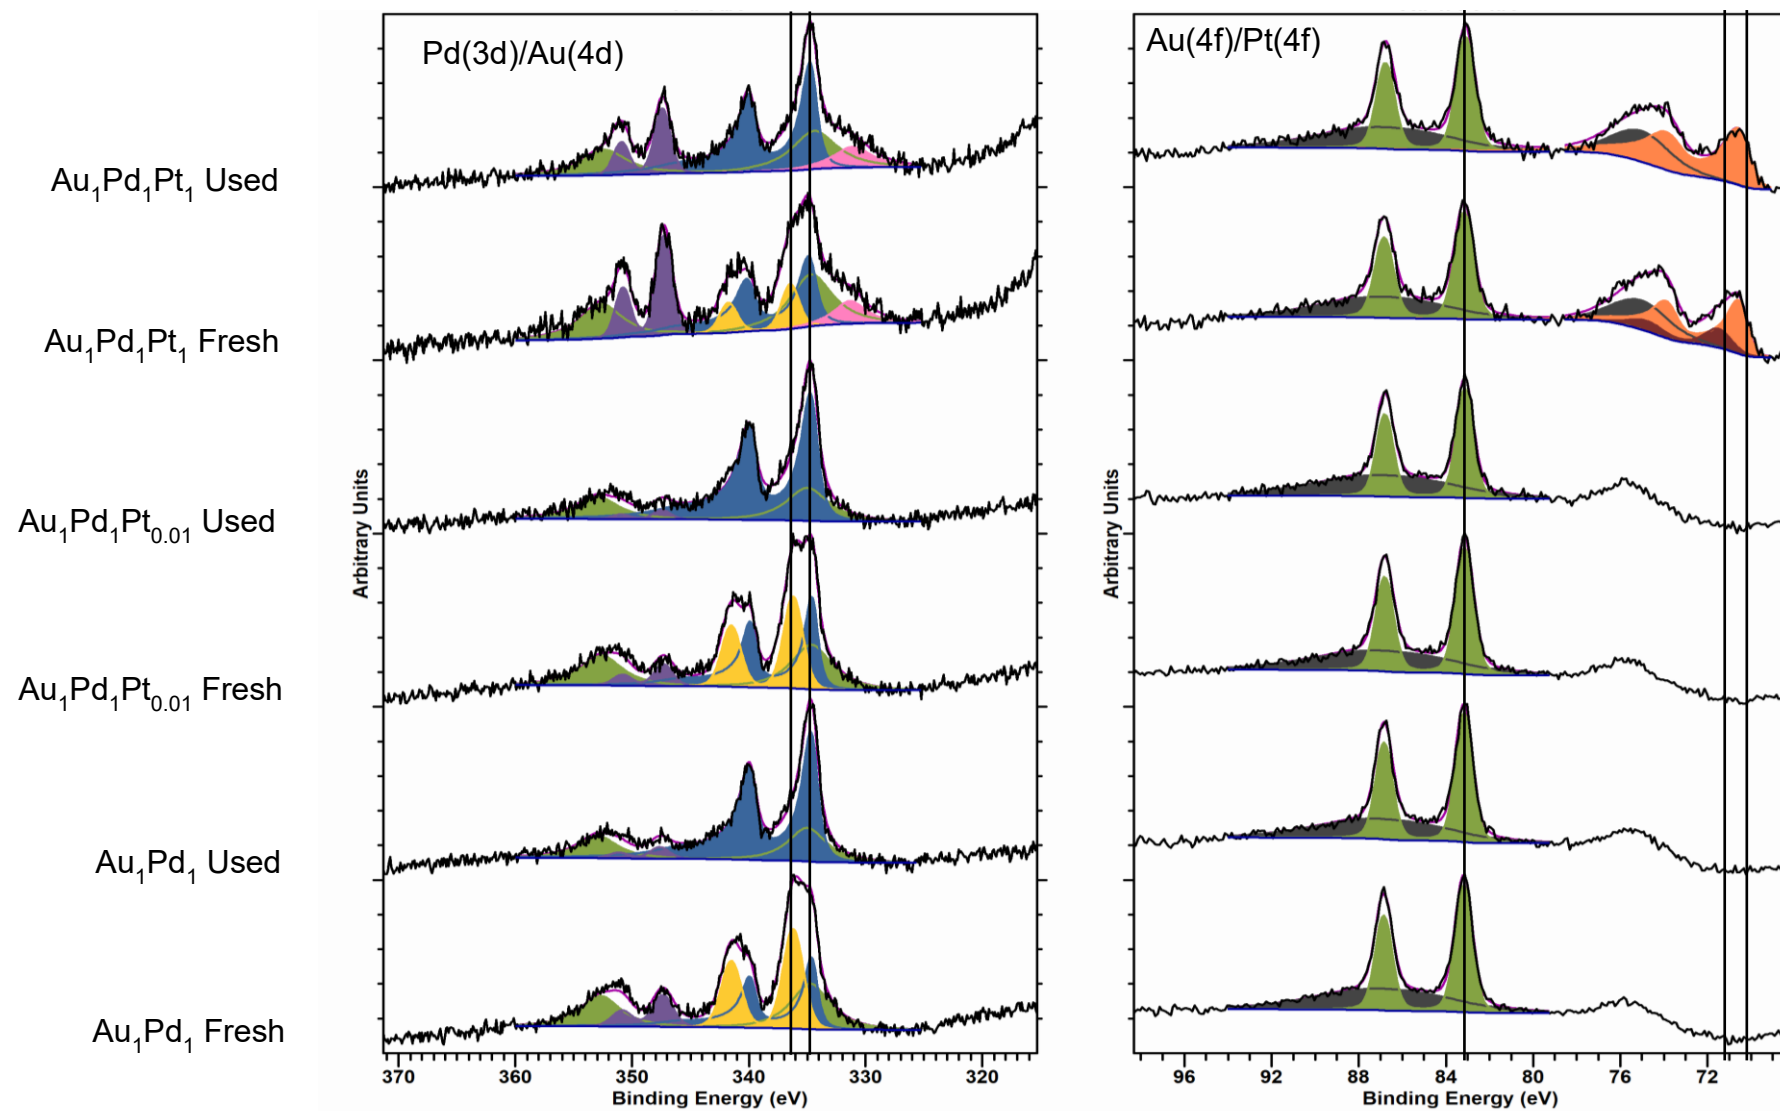

**Figure S2.** Corresponding XPS Pd(3d)/Au(4d) and Au(4f)/Pt(4f) spectra for fresh and used 1%Au<sub>1</sub>Pd<sub>1</sub>/TiO<sub>2</sub>, 1%Au<sub>1</sub>Pd<sub>1</sub>Pt<sub>0.01</sub>/TiO<sub>2</sub>, and 1%Au<sub>1</sub>Pd<sub>1</sub>Pt<sub>1</sub>/TiO<sub>2</sub> catalysts. Au<sup>0</sup>= Green, Pd<sup>0</sup>=Blue, Pd<sup>2+</sup>= Yellow, Pt<sup>0</sup>= Peach, Pt<sup>2+</sup> = Burgundy, Ca<sup>2+</sup>= Purple, Ti loss of structure = Black.

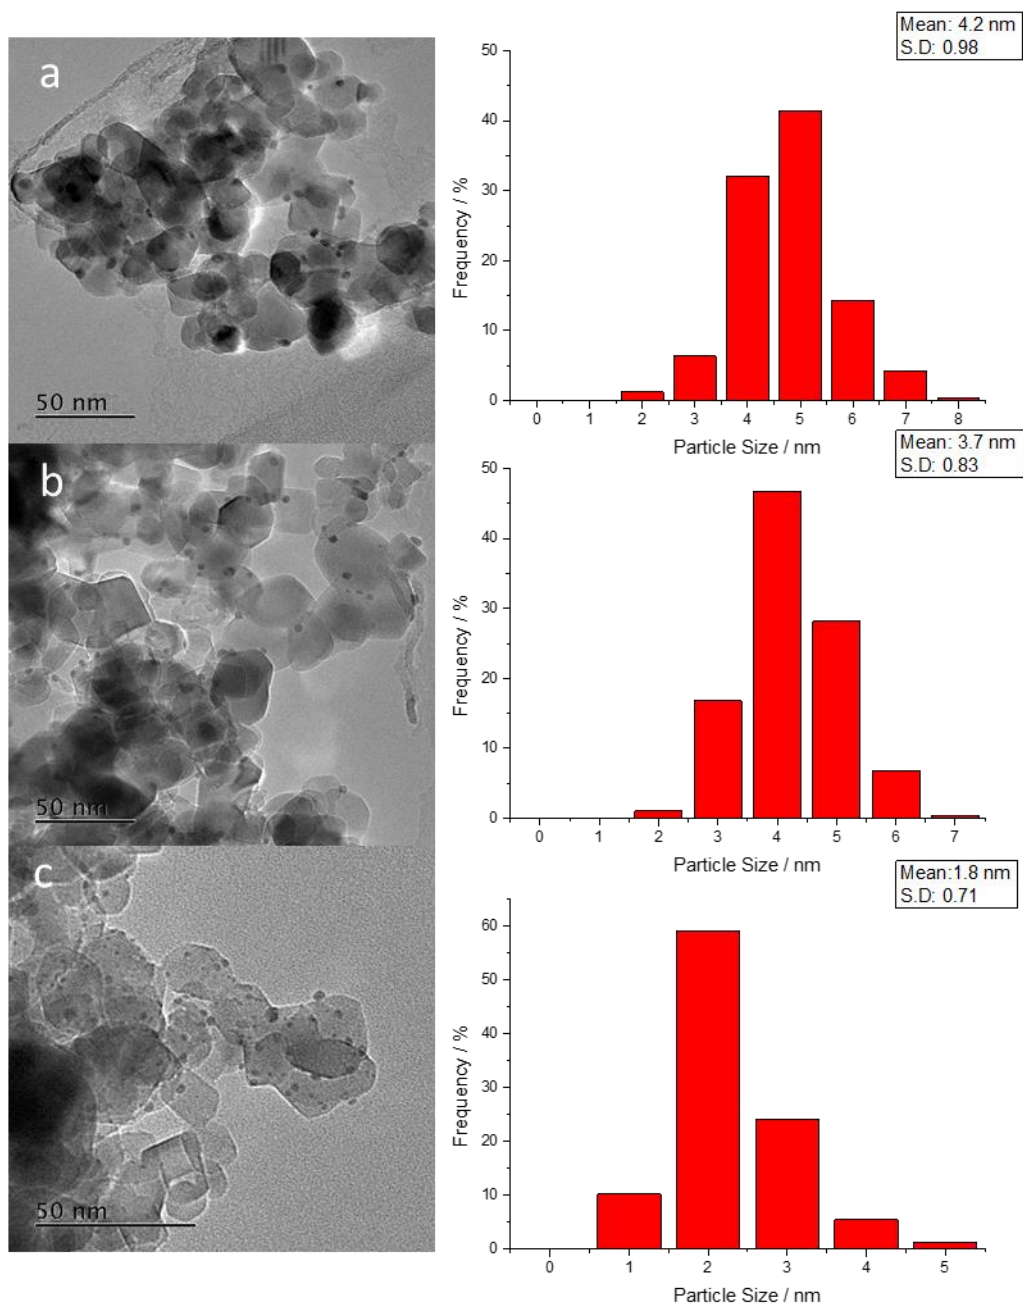

**Figure S3.** Representative bright field transmission electron micrographs and corresponding particle size distributions of TiO<sub>2</sub> supported bi- and tri-metallic catalysts prepared by a sol-immobilisation methodology, calcined 400 °C, 3h, static air, ramp rate = 10 °C min<sup>-1</sup>. (a) 1%Au<sub>1</sub>Pd<sub>1</sub>/TiO<sub>2</sub>, (b) 1%Au<sub>1</sub>Pd<sub>1</sub>Pt<sub>0.01</sub>/TiO<sub>2</sub>, and (c) 1%Au<sub>1</sub>Pd<sub>1</sub>Pt<sub>1</sub>/TiO<sub>2</sub>.

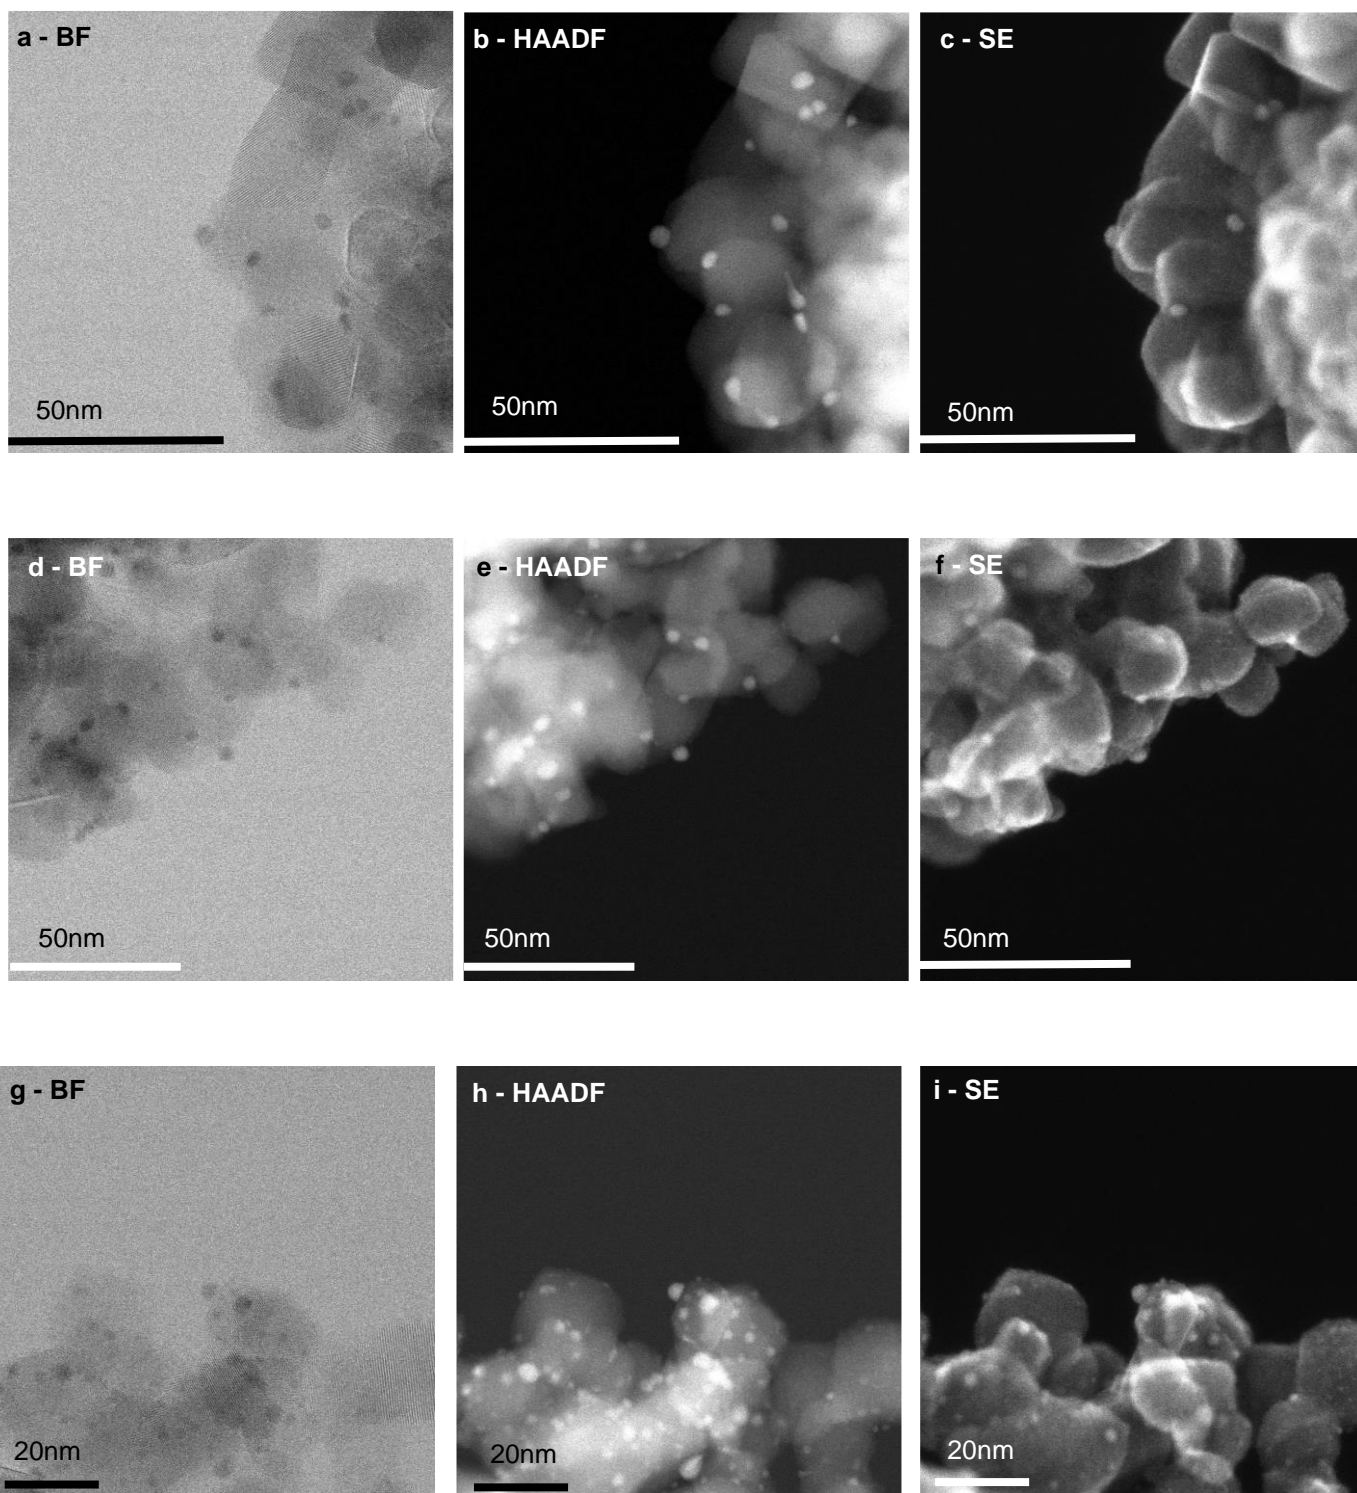

**Figure S4** - Complementary bright field (BF)-STEM, high angle annular dark field (HAADF)-STEM and secondary electron (SE)-STEM images of (a, b, c) 1% Au<sub>1</sub>Pd<sub>1</sub>/TiO<sub>2</sub>, (d, e, f) 1% Au<sub>1</sub>Pd<sub>1</sub>Pt<sub>0.01</sub>/TiO<sub>2</sub> and (g, h, i) 1% Au<sub>1</sub>Pd<sub>1</sub>Pt<sub>1</sub>/TiO<sub>2</sub> catalyst samples prepared by sol-immobilisation.

**Table S1.** Elemental composition of 1%AuPdPt/TiO<sub>2</sub> catalysts before and after use in the direct synthesis of H<sub>2</sub>O<sub>2</sub>, as determined by EDX.

| Catalyst                                                               | Au (At%) | Pd (At%) | Pt (At%) |
|------------------------------------------------------------------------|----------|----------|----------|
| 1%Au <sub>1</sub> Pd <sub>1</sub> /TiO <sub>2</sub>                    | 0.19     | 0.15     | -        |
| 1%Au <sub>1</sub> Pd <sub>1</sub> Pt <sub>0.01</sub> /TiO <sub>2</sub> | 0.17     | 0.18     | BDL*     |
| 1%Au <sub>1</sub> Pd <sub>1</sub> Pt <sub>1</sub> /TiO <sub>2</sub>    | 0.17     | 0.11     | 0.11     |

**Table S2.** Comparison of initial H<sub>2</sub>O<sub>2</sub> synthesis rates over various TiO<sub>2</sub> supported AuPdPt catalysts.

| Catalyst                                                               | Rate of reaction / mmol <sub>H<sub>2</sub>O<sub>2</sub></sub> min <sup>-1</sup> |        |
|------------------------------------------------------------------------|---------------------------------------------------------------------------------|--------|
|                                                                        | Use 1                                                                           | Use 2* |
| 1%Au <sub>1</sub> Pd <sub>1</sub> /TiO <sub>2</sub>                    | 0.034                                                                           | 0.042  |
| 1%Au <sub>1</sub> Pd <sub>1</sub> Pt <sub>0.01</sub> /TiO <sub>2</sub> | 0.049                                                                           | 0.056  |
| 1%Au <sub>1</sub> Pd <sub>1</sub> Pt <sub>1</sub> /TiO <sub>2</sub>    | 0.023                                                                           | 0.027  |

\*Catalyst used for 30 min under standard reaction conditions prior to determination of reaction rate over 0.083 h.

**H<sub>2</sub>O<sub>2</sub> direct synthesis reaction conditions:** Catalyst (0.01g), H<sub>2</sub>O (2.9g), MeOH (5.6g), 5% H<sub>2</sub> / CO<sub>2</sub> (420 psi), 25% O<sub>2</sub> / CO<sub>2</sub> (160 psi), 0.083 h, 2 °C 1200 rpm

**Table S3.** Elemental surface composition of 1%AuPdPt/TiO<sub>2</sub> catalysts after use in the direct synthesis of H<sub>2</sub>O<sub>2</sub>, as determined by XPS analysis.

| Catalyst                                                               |       | Au : Pt | Pd : Au | Pd <sup>2+</sup> : Pd <sup>0</sup> |
|------------------------------------------------------------------------|-------|---------|---------|------------------------------------|
| 1%Au <sub>1</sub> Pd <sub>1</sub> /TiO <sub>2</sub>                    | Fresh | -       | 1.92    | 1.30                               |
|                                                                        | Used  | -       | 2.27    | 0.00                               |
| 1%Au <sub>1</sub> Pd <sub>1</sub> Pt <sub>0.01</sub> /TiO <sub>2</sub> | Fresh | n.d     | 1.92    | 0.92                               |
|                                                                        | Used  | n.d     | 2.78    | 0.00                               |
| 1%Au <sub>1</sub> Pd <sub>1</sub> Pt <sub>1</sub> /TiO <sub>2</sub>    | Fresh | 0.78    | 1.86    | 0.63                               |
|                                                                        | Used  | 0.50    | 1.78    | 0.00                               |

**H<sub>2</sub>O<sub>2</sub> direct synthesis reaction conditions:** Catalyst (0.01g), H<sub>2</sub>O (2.9g), MeOH (5.6g), 5% H<sub>2</sub> / CO<sub>2</sub> (420 psi), 25% O<sub>2</sub> / CO<sub>2</sub> (160 psi), 0.5 h, 2 °C 1200 rpm.

n.d: not able to determine

**Table S4.** Total metal leaching from various TiO<sub>2</sub> supported AuPdPt catalysts during H<sub>2</sub>O<sub>2</sub> synthesis reaction, as determined by ICP-MS analysis.

| Catalyst                                                               | Productivity (Fresh) / mol <sub>H<sub>2</sub>O<sub>2</sub></sub> kg <sub>cat</sub> <sup>-1</sup> h <sup>-1</sup> | Au Leaching / μgL <sup>-1</sup> | Pd Leaching / μgL <sup>-1</sup> | Pt Leaching / μgL <sup>-1</sup> |
|------------------------------------------------------------------------|------------------------------------------------------------------------------------------------------------------|---------------------------------|---------------------------------|---------------------------------|
| 1%Au <sub>1</sub> Pd <sub>1</sub> /TiO <sub>2</sub>                    | 81                                                                                                               | -                               | 0.21                            | -                               |
| 1%Au <sub>1</sub> Pd <sub>1</sub> Pt <sub>0.01</sub> /TiO <sub>2</sub> | 112                                                                                                              | -                               | 1.56                            | -                               |
| 1%Au <sub>1</sub> Pd <sub>1</sub> Pt <sub>1</sub> /TiO <sub>2</sub>    | 30                                                                                                               | -                               | -                               | -                               |

**H<sub>2</sub>O<sub>2</sub> direct synthesis reaction conditions:** Catalyst (0.01g), H<sub>2</sub>O (2.9g), MeOH (5.6g), 5% H<sub>2</sub> / CO<sub>2</sub> (420 psi), 25% O<sub>2</sub> / CO<sub>2</sub> (160 psi), 0.5 h, 2 °C 1200 rpm.

**Table S5.** Mean metal particle size of various TiO<sub>2</sub> supported AuPdPt catalysts, as prepared and after use in the H<sub>2</sub>O<sub>2</sub> synthesis reaction, as determined by analysis of bright field TEM micrographs.

| <b>Catalyst</b>                                                        | <b>Mean Particle size / nm (Standard deviation)</b> |            |
|------------------------------------------------------------------------|-----------------------------------------------------|------------|
|                                                                        | Fresh *                                             | Used **    |
| 1%Au <sub>1</sub> Pd <sub>1</sub> /TiO <sub>2</sub>                    | 4.2 (0.98)                                          | 4.3 (0.91) |
| 1%Au <sub>1</sub> Pd <sub>1</sub> Pt <sub>0.01</sub> /TiO <sub>2</sub> | 3.7 (0.55)                                          | 4.6 (1.2)  |
| 1%Au <sub>1</sub> Pd <sub>1</sub> Pt <sub>1</sub> /TiO <sub>2</sub>    | 1.8 (0.56)                                          | 2.2 (0.84) |

\* Catalysts calcined, 400 °C, 3h, static air. \*\* Catalysts dried under vacuum (17h, 30 °C) after first use in H<sub>2</sub>O<sub>2</sub> synthesis reaction.

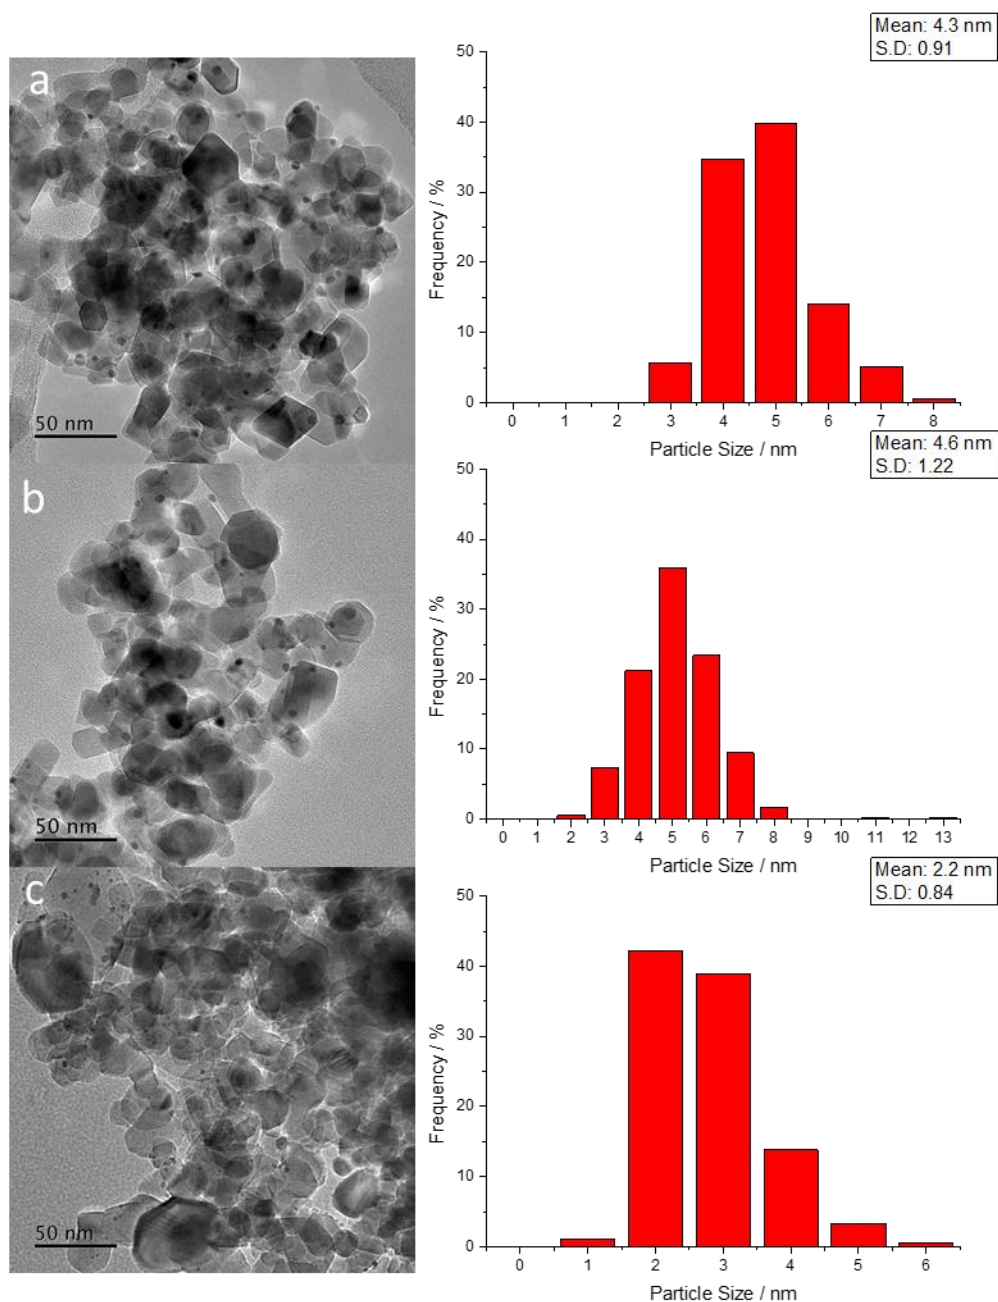

**Figure S5.** Representative bright field transmission electron micrographs and corresponding particle size distributions of 1% AuPdPt/TiO<sub>2</sub> catalysts after use in the direct synthesis of H<sub>2</sub>O<sub>2</sub>. Catalysts prepared by a sol-immobilisation methodology, calcined 400 °C, 3h, static air, ramp rate = 10 °C min<sup>-1</sup>. (a) 1%Au<sub>1</sub>Pd<sub>1</sub>/TiO<sub>2</sub>, (b) 1%Au<sub>1</sub>Pd<sub>1</sub>Pt<sub>0.01</sub>/TiO<sub>2</sub> and (c) 1%Au<sub>1</sub>Pd<sub>1</sub>Pt<sub>1</sub>/TiO<sub>2</sub>.
